# Supplementary material for: Molecular Diagnosis of Panel-Based Next-Generation Sequencing Approach and Clinical Symptoms in Patients With Glycogen Storage Disease: A Single Center Retrospective Study
Source: Front Pediatr. 2020 Dec 3;8:600446. doi: 10.3389/fped.2020.600446 (PMC7744419; doi:10.3389/fped.2020.600446)
Supplement: Supplementary file 1 [file Table_1.XLSX]

## Sheet: Sheet1
Supp. Table S1. Genes comprising the Glycogen Storage Disease Panel and corresponding assays.
Target gene	OMIM	Genetic pattern	Chromosome Location	Transcript
AGL	Glycogen storage disease III（OMIM:232400）	AR	1p21.2	NM_000642
GAA	Glycogen storage disease II（OMIM:232300）	AR	17q25.3	NM_000152
ALDOA	Glycogen storage disease XII（OMIM:611881）	AR	16p11.2	NM_000034
ALDOB	Fructose intolerance, hereditary（OMIM:229600）	AR	9q31.1	NM_000035
ENO3	Glycogen storage disease XIII（OMIM:612932）	AR	17p13.2	NM_053013
EPM2A	Myoclonic epilepsy of Lafora (OMIM:254780）	AR	6q24.3	NM_001368132
FBP1	Fructose 1,6-bisphosphatase deficiency; FBP1D（OMIM:229700）	AR	9q22.32	NM_000507
FBP2	Fructose 1,6-bisphosphatase deficiency; FBP1D（OMIM:229700）	-	9q22.32	NM_003837
G6PC	Glycogen storage disease Ia（OMIM:232200）	AR	17q21.31	NM_001270397
GALT	Galactosemia（OMIM:230400）	AR	9p13.3	NM_000155
GBE1	1.Glycogen storage disease IV（OMIM:232500）|2.Adult polyglucosan body disease（OMIM:263570）	1.AR|2.AR	3p12.2	NM_000158
GYG1	1.Glycogen storage disease XV（OMIM:613507）|2.Polyglucosan body myopathy（OMIM:616199）	1.AR|2.AR	3q24	NM_004130
GYS1	Glycogen storage disease 0, muscle; GSD0B（OMIM:611556）	AR	19q13.33	NM_002103
GYS2	Glucose storage disease 0, liver; GSD0A（OMIM:240600）	AR	12p12.1	NM_021957
LAMP2	Danon disease（OMIM:300257）	XL	Xq24	NM_002294
LCT	Lactase deficiency, congenital（OMIM:223000）	AR	2q21.3	NM_002299
LDHA	Glycogen storage disease XI（OMIM:612933）	AR	11p15.1	NM_005566
NHLRC1	Myoclonic epilepsy of Lafora （OMIM:254780）	AR	6p22.3	NM_198586
PC	Pyruvate carboxylase deficiency（OMIM:266150）	AR	11q13.2	NM_000920
PFKM	Glycogen storage disease VII（OMIM:232800）	AR	12q13.11	NM_001166686
PGAM2	Glycogen storage disease X（OMIM:261670）	AR	7p13	NM_000290
PGM1	Glycogen storage disease XIV（OMIM:614921）	AR	1p31.3	NM_002633
PHKA1	Glycogen storage disease IXd（OMIM:300559）	XR	Xq13.1	NM_002637
PHKA2	Glycogen storage disease IXa1（OMIM:306000）	XR	Xp22.13	NM_000292
PHKB	Glycogen storage disease IXb（OMIM:261750）	AR	16q12.1	NM_001031835
PHKG1	Phosphokinase, muscle, GAMMA-1(OMIM:172470)	-	7p11.2	NM_001258459
PHKG2	Glycogen storage disease IXc（OMIM:613027）	AR	16p11.2	NM_000294
PRKAG2	1.Glycogen storage disease of heart,lethal congenital（OMIM:261740）|2.Wolff-Parkinson-White syndrome（OMIM:194200）|3.Cardiomyopathy,familial hypertrophy,6（OMIM:600858）	1.AR|2.AD|3.AD	7q36.1	NM_016203
PRKAG3	Changes of glycogen and triglyceride levels in the muscles	-	2q35	NM_017431
PYGL	Glycogen storage disease VI（OMIM:232700）	AR	14q22.1	NM_001163940
PYGM	Glycogen storage disease V（OMIM:232600）	AR	11q13.1	NM_001164716
RBCK1	Polyglucosan body myopathy or immunological dysfunction（OMIM:615895）	AR	20p13	NM_001323958
SI	Congenital sucrase-isomaltase deficiency（OMIM:222900）	AR	3q26.1	NM_001041
SLC17A3	Glycogen storage related disease，Uric acid concentration, serum,quantitative trait locus 4; UAQTL4（OMIM:612671）	-	6p22.2	NM_006632
SLC2A2	1.Non—insulin—dependent diabetes mellit（OMIM:125853）|2.Fanconi-Bickel syndrome（OMIM:227810）	1.-|2.AR	3q26.2	NM_000340
SLC37A4	1.Glycogen storage disease Ic（OMIM:232240）|2.Glycogen storage disease Ib（OMIM:232220）	1.AR|2.AR	11q23.3	NM_001164279
SLC5A1	glucose-galactose malabsorption（OMIM:606824）	AR	22q12.3	NM_000343
